# Supplementary material for: An Evolution-Based Approach to De Novo Protein Design and Case Study on Mycobacterium tuberculosis
Source: PubMed Central journal article supplement (PMC3812052; doi:10.1371/journal.pcbi.1003298), 2013-10-24
Supplement: pcbi.1003298.s006.pdf [file pcbi.1003298.s006.pdf]

**Table S1.** List of designed proteins from previous experiments.

| <b>Sequence ID</b> | <b>PDB ID</b> | <b>Length</b> | <b>Failed step<sup>a</sup></b> | <b>References</b>   |
|--------------------|---------------|---------------|--------------------------------|---------------------|
| 1lq7A              | 1lq7A         | 67            | Success                        | Dai et al [1]       |
| 1mj0A              | 1mj0A         | 156           | Success                        | Kohl et al [2]      |
| 1p68A              | 1p68A         | 102           | Success                        | Wei et al [3]       |
| 1qysA              | 1qysA         | 91            | Success                        | Kuhlman et al [4]   |
| 1vjqa              | 1vjqa         | 71            | Success                        | Dantas et al [5]    |
| 2a3dA              | 2a3dA         | 73            | Success                        | Walsh et al [6]     |
| 2cw1A              | 2cw1A         | 65            | Success                        | Walsh et al [6]     |
| 2juaA              | 2juaA         | 102           | Success                        | Go et al [7]        |
| 2jvfA              | 2jvfA         | 94            | Success                        | Stordeur et al [8]  |
| 2kl8A              | 2kl8A         | 85            | Success                        | Koga et al [9]      |
| 2ln3A              | 2ln3A         | 83            | Success                        | Koga et al [9]      |
| 2ltaA              | 2ltaA         | 110           | Success                        | Koga et al [9]      |
| 2lv8A              | 2lv8A         | 110           | Success                        | Koga et al [9]      |
| 2lvbA              | 2lvbA         | 112           | Success                        | Koga et al [9]      |
| 2qyjA              | 2qyjA         | 154           | Success                        | Merz et al [10]     |
| 3b83A              | 3b83A         | 95            | Success                        | Hu et al [11]       |
| MSP2-FC27          | /             | 237           | Natively unfolded              | Zhang et al [12]    |
| alpha-synuclein    | /             | 140           | Natively unfolded              | Eliezer et al [13]  |
| 4EbindingproteinI  | /             | 118           | Natively unfolded              | Fletcher et al [14] |
| 4EbindingproteinII | /             | 120           | Natively unfolded              | Fletcher et al [14] |
| Fold-I-11          | /             | 76            | Not soluble                    | Koga et al [9]      |
| Fold-I-2           | /             | 76            | Not folded-CD                  | Koga et al [9]      |
| Fold-I-4           | /             | 76            | Not folded-CD                  | Koga et al [9]      |
| Fold-I-8           | /             | 76            | Not folded NMR                 | Koga et al [9]      |
| Fold-II-8          | /             | 99            | Not folded-CD                  | Koga et al [9]      |
| Fold-II-9          | /             | 99            | Not folded-CD                  | Koga et al [9]      |
| Fold-II-1          | /             | 99            | Not folded NMR                 | Koga et al [9]      |
| Fold-II-3          | /             | 99            | Not folded NMR                 | Koga et al [9]      |
| Fold-II-11         | /             | 99            | Not folded NMR                 | Koga et al [9]      |
| Fold-III-6         | /             | 72            | Not soluble                    | Koga et al [9]      |
| Fold-III-7         | /             | 72            | Not soluble                    | Koga et al [9]      |
| Fold-III-1         | /             | 72            | Incorrect CD                   | Koga et al [9]      |
| Fold-III-13        | /             | 72            | Not folded-CD                  | Koga et al [9]      |
| Fold-III-4         | /             | 72            | Not folded NMR                 | Koga et al [9]      |
| Fold-IV-2          | /             | 101           | Not folded NMR                 | Koga et al [9]      |
| Fold-V-8           | /             | 99            | Not soluble                    | Koga et al [9]      |
| Fold-V-1           | /             | 99            | Not folded-CD                  | Koga et al [9]      |
| Fold-V-2           | /             | 99            | Not folded-CD                  | Koga et al [9]      |
| Fold-V-4           | /             | 99            | Not folded-CD                  | Koga et al [9]      |
| Fold-V-9           | /             | 99            | Not folded-CD                  | Koga et al [9]      |
| Fold-V-10          | /             | 99            | Not folded-CD                  | Koga et al [9]      |
| Fold-V-11          | /             | 99            | Not folded-CD                  | Koga et al [9]      |

|           |   |    |               |                    |
|-----------|---|----|---------------|--------------------|
| Fold-V-12 | / | 99 | Not folded-CD | Koga et al [9]     |
| MDM2a     | / | 85 | Not folded-CD | Shultis et al [15] |
| MDM2b     | / | 85 | Not folded-CD | Shultis et al [15] |

<sup>a</sup>**Success:** protein structure was solvable by NMR or X-ray crystallography; **Natively unfolded:** biologically expressed (i.e. not designed) protein experimentally known to be unfolded in the native state; **Not soluble:** protein was not soluble after expression (usually indicative of improperly exposed hydrophobic surfaces); **Not folded-CD:** largely random coil secondary structure by CD; **Incorrect CD:** secondary structure by CD not consistent with predicted structure; **Not folded NMR:** poorly resolved NMR spectra reflective of a dynamic (unstable) protein core.

## References

1. Dai QH, Tommos C, Fuentes EJ, Blomberg MR, Dutton PL, et al. (2002) Structure of a de novo designed protein model of radical enzymes. *J Am Chem Soc* 124: 10952-10953.
2. Kohl A, Binz HK, Forrer P, Stumpp MT, Pluckthun A, et al. (2003) Designed to be stable: crystal structure of a consensus ankyrin repeat protein. *Proc Natl Acad Sci U S A* 100: 1700-1705.
3. Wei Y, Kim S, Fela D, Baum J, Hecht MH (2003) Solution structure of a de novo protein from a designed combinatorial library. *Proc Natl Acad Sci U S A* 100: 13270-13273.
4. Kuhlman B, Dantas G, Ireton GC, Varani G, Stoddard BL, et al. (2003) Design of a novel globular protein fold with atomic-level accuracy. *Science* 302: 1364-1368.
5. Dantas G, Corrent C, Reichow SL, Havranek JJ, Eletr ZM, et al. (2007) High-resolution structural and thermodynamic analysis of extreme stabilization of human procarboxypeptidase by computational protein design. *Journal of Molecular Biology* 366: 1209-1221.
6. Walsh ST, Cheng H, Bryson JW, Roder H, DeGrado WF (1999) Solution structure and dynamics of a de novo designed three-helix bundle protein. *Proc Natl Acad Sci U S A* 96: 5486-5491.
7. Go A, Kim S, Baum J, Hecht MH (2008) Structure and dynamics of de novo proteins from a designed superfamily of 4-helix bundles. *Protein Sci* 17: 821-832.
8. Stordeur C, Dalluge R, Birkenmeier O, Wienk H, Rudolph R, et al. (2008) The NMR solution structure of the artificial protein M7 matches the computationally designed model. *Proteins* 72: 1104-1107.
9. Koga N, Tatsumi-Koga R, Liu G, Xiao R, Acton TB, et al. (2012) Principles for designing ideal protein structures. *Nature* 491: 222-227.
10. Merz T, Wetzel SK, Firbank S, Pluckthun A, Grutter MG, et al. (2008) Stabilizing ionic interactions in a full-consensus ankyrin repeat protein. *Journal of Molecular Biology* 376: 232-240.
11. Hu X, Wang H, Ke H, Kuhlman B (2008) Computer-based redesign of a beta sandwich protein suggests that extensive negative design is not required for de novo beta sheet design. *Structure* 16: 1799-1805.

12. Zhang X, Perugini MA, Yao S, Adda CG, Murphy VJ, et al. (2008) Solution conformation, backbone dynamics and lipid interactions of the intrinsically unstructured malaria surface protein MSP2. *Journal of Molecular Biology* 379: 105-121.
13. Eliezer D, Kutluay E, Bussell R, Jr., Browne G (2001) Conformational properties of alpha-synuclein in its free and lipid-associated states. *Journal of Molecular Biology* 307: 1061-1073.
14. Fletcher CM, McGuire AM, Gingras AC, Li H, Matsuo H, et al. (1998) 4E binding proteins inhibit the translation factor eIF4E without folded structure. *Biochemistry* 37: 9-15.
15. Shultis D, Mitra P, Zhang Y (2013) Unpublished results.
