# Supplementary material for: An Evolution-Based Approach to De Novo Protein Design and Case Study on Mycobacterium tuberculosis
Source: PubMed Central journal article supplement (PMC3812052; doi:10.1371/journal.pcbi.1003298), 2013-10-24
Supplement: pcbi.1003298.s007.pdf [file pcbi.1003298.s007.pdf]

**Table S2.** Summary of EBM design on the 87 test proteins.

| PDBID  | L <sup>a</sup> | SC <sup>b</sup> | aTM <sup>c</sup> | TM <sup>d</sup> | R (Å) <sup>e</sup> | Normalized relative error |       |       |       | Sequence identity (%) |      |
|--------|----------------|-----------------|------------------|-----------------|--------------------|---------------------------|-------|-------|-------|-----------------------|------|
|        |                |                 |                  |                 |                    | SS                        | Φ     | Ψ     | SA    | All                   | Core |
| 1A2P_A | 109            | a+b             | 0.36             | 0.99            | 0.37               | 0.06                      | 0.17  | 0.08  | -0.05 | 42                    | 44   |
| 1ABA_A | 88             | a/b             | 0.66             | 0.87            | 1.93               | 0.20                      | 0.27  | 0.17  | -0.01 | 34                    | 54   |
| 1BKR_A | 109            | a               | 0.82             | 0.99            | 0.29               | -0.22                     | 0.02  | -0.11 | -0.02 | 43                    | 63   |
| 1DBW_A | 124            | a/b             | 0.76             | 0.88            | 1.71               | 0.00                      | -0.03 | -0.05 | -0.08 | 28                    | 38   |
| 1EAQ_A | 125            | b               | 0.64             | 0.91            | 1.45               | -0.10                     | -0.06 | -0.20 | -0.13 | 30                    | 54   |
| 1EW4_A | 107            | a+b             | 0.50             | 0.95            | 0.92               | 0.92                      | 0.24  | 0.42  | 0.05  | 17                    | 21   |
| 1F46_A | 140            | a+b             | 0.55             | 0.98            | 0.45               | -0.09                     | 0.01  | 0.09  | -0.05 | 28                    | 42   |
| 1GBS_A | 186            | a+b             | 0.67             | 0.99            | 0.18               | 1.30                      | 0.02  | -0.04 | 0.04  | 46                    | 53   |
| 1GUT_A | 52             | b               | 0.74             | 0.97            | 0.36               | 0.33                      | 0.09  | -0.05 | 0.08  | 25                    | 44   |
| 1HZT_A | 151            | a+b             | 0.77             | 0.99            | 0.45               | -0.13                     | 0.43  | 0.11  | 0.04  | 25                    | 33   |
| 1I2T_A | 62             | a               | 0.59             | 0.96            | 0.51               | 0.14                      | -0.20 | 0.58  | 0.13  | 20                    | 50   |
| 1IDP_A | 148            | a+b             | 0.79             | 0.94            | 1.20               | 0.03                      | -0.06 | -0.01 | -0.02 | 24                    | 30   |
| 1IUJ_A | 98             | a+b             | 0.78             | 0.78            | 2.22               | 0.71                      | -0.07 | -0.13 | -0.17 | 25                    | 36   |
| 1JB3_A | 128            | b               | 0.60             | 0.98            | 0.51               | -0.04                     | 0.23  | 0.26  | 0.03  | 25                    | 37   |
| 1JF8_A | 131            | a/b             | 0.90             | 0.99            | 0.44               | -0.36                     | 0.03  | 0.44  | 0.06  | 35                    | 50   |
| 1KMT_A | 139            | b               | 0.66             | 0.99            | 0.31               | 0.07                      | 0.09  | 0.21  | -0.04 | 27                    | 30   |
| 1KNG_A | 145            | a/b             | 0.76             | 0.96            | 0.88               | 0.19                      | 0.06  | 0.18  | 0.01  | 30                    | 39   |
| 1KQ1_A | 61             | b               | 0.81             | 0.96            | 0.50               | 0.29                      | 0.16  | 0.25  | 0.01  | 28                    | 62   |
| 1M9Z_A | 106            | small           | 0.60             | 0.96            | 0.83               | 0.13                      | 0.11  | 0.06  | -0.01 | 35                    | 59   |
| 1MF7_A | 195            | a/b             | 0.83             | 0.95            | 1.36               | 0.08                      | 0.26  | 0.03  | 0.02  | 27                    | 36   |
| 1MG4_A | 102            | a+b             | 0.50             | 0.63            | 3.55               | 1.83                      | 0.50  | 0.48  | 0.24  | 14                    | 23   |
| 1NXM_A | 195            | b               | 0.56             | 0.96            | 1.13               | 0.27                      | 0.21  | 0.27  | 0.00  | 23                    | 30   |
| 1NZ0_A | 110            | a+b             | 0.52             | 0.84            | 1.75               | 0.53                      | 0.29  | 0.53  | 0.10  | 14                    | 13   |
| 1O7I_A | 116            | b               | 0.81             | 0.94            | 1.01               | 0.00                      | 0.20  | -0.10 | 0.00  | 30                    | 41   |
| 1OAI_A | 58             | a               | 0.67             | 0.85            | 1.48               | -0.80                     | 0.60  | 1.73  | 0.04  | 28                    | 31   |
| 1OH0_A | 126            | a+b             | 0.78             | 0.95            | 1.17               | -0.05                     | 0.14  | 0.10  | 0.00  | 27                    | 32   |
| 1OK0_A | 75             | b               | 0.62             | 0.60            | 7.22               | 0.00                      | 0.00  | -0.09 | 0.07  | 18                    | 45   |
| 1QHQ_A | 140            | b               | 0.65             | 0.37            | 11.00              | 0.24                      | 0.17  | 0.06  | 0.20  | 35                    | 38   |
| 1R26_A | 106            | a/b             | 0.79             | 0.93            | 1.01               | 0.20                      | 0.15  | -0.08 | 0.01  | 34                    | 51   |
| 1R6J_A | 83             | b               | 0.82             | 0.89            | 1.68               | 0.00                      | 0.39  | 0.28  | 0.03  | 24                    | 40   |
| 1SHU_X | 182            | a/b             | 0.84             | 0.91            | 1.73               | 0.25                      | 0.25  | 0.10  | 0.06  | 23                    | 38   |
| 1T3Y_A | 132            | a+b             | 0.88             | 0.85            | 1.97               | 0.00                      | -0.03 | -0.12 | 0.06  | 19                    | 33   |
| 1TQG_A | 106            | a               | 0.75             | 0.97            | 0.64               | 1.50                      | 0.22  | 1.01  | -0.02 | 19                    | 33   |
| 1TUK_A | 68             | a               | 0.53             | 0.38            | 5.30               | 0.33                      | 0.12  | 0.98  | 0.06  | 9                     | 11   |
| 1UCS_A | 65             | b               | 0.75             | 0.97            | 0.50               | -0.05                     | -0.13 | -0.12 | 0.05  | 53                    | 67   |
| 1URR_A | 98             | a+b             | 0.85             | 0.95            | 0.80               | 0.13                      | 0.08  | 0.16  | -0.01 | 34                    | 50   |
| 1UTG_A | 71             | a               | 0.50             | 0.98            | 0.42               | 2.33                      | -0.25 | 0.30  | -0.19 | 10                    | 10   |
| 1V5I_B | 71             | a+b             | 0.65             | 0.87            | 1.36               | -0.43                     | 0.10  | 0.77  | 0.02  | 24                    | 45   |
| 1VH5_A | 139            | a+b             | 0.81             | 0.98            | 0.64               | 0.88                      | 0.45  | 0.27  | 0.03  | 25                    | 33   |
| 1VKK_A | 138            | a+b             | 0.86             | 0.91            | 1.70               | 0.06                      | 0.19  | 0.38  | 0.00  | 29                    | 32   |
| 1VQS_A | 105            | a+b             | 0.66             | 0.98            | 0.56               | 0.05                      | 0.49  | 0.28  | 0.03  | 15                    | 21   |

|         |     |       |      |      |       |       |       |       |       |    |    |
|---------|-----|-------|------|------|-------|-------|-------|-------|-------|----|----|
| 1VZI_A  | 126 | b     | 0.32 | 0.18 | 16.93 | 1.93  | 0.36  | 0.79  | 0.30  | 17 | 33 |
| 1WLU_A  | 118 | a+b   | 0.79 | 0.98 | 0.45  | 0.14  | 0.33  | 0.10  | 0.00  | 29 | 26 |
| 1X6Z_A  | 120 | a+b   | 0.70 | 0.93 | 1.20  | -0.24 | 0.19  | 0.13  | -0.02 | 34 | 43 |
| 1XTE_A  | 117 | a+b   | 0.81 | 0.97 | 0.71  | 0.00  | 0.27  | 0.21  | -0.05 | 32 | 56 |
| 1ZHV_A  | 129 | a+b   | 0.80 | 0.57 | 8.26  | 1.08  | 0.26  | 1.14  | 0.18  | 18 | 21 |
| 1ZKE_A  | 82  | a     | 0.61 | 0.92 | 1.11  | -0.22 | -0.16 | -0.47 | 0.05  | 14 | 18 |
| 1ZZK_A  | 81  | a+b   | 0.79 | 0.89 | 2.99  | -0.29 | 0.57  | 0.19  | 0.00  | 36 | 50 |
| 2ANX_A  | 146 | a+b   | 0.81 | 0.99 | 0.30  | 0.04  | 0.18  | 0.04  | 0.06  | 30 | 34 |
| 2BWF_A  | 76  | a+b   | 0.81 | 0.90 | 1.31  | -0.35 | 0.34  | 0.15  | 0.00  | 32 | 65 |
| 2C9Q_A  | 103 | b     | 0.63 | 0.86 | 1.83  | 0.22  | -0.18 | 0.17  | 0.02  | 30 | 36 |
| 2CAR_A  | 197 | a/b   | 0.78 | 0.99 | 0.44  | -0.06 | 0.05  | 0.04  | -0.49 | 29 | 36 |
| 2CMP_A  | 53  | a     | 0.52 | 0.94 | 0.61  | 3.00  | 0.00  | 0.63  | 0.21  | 25 | 46 |
| 2CVI_A  | 78  | a+b   | 0.76 | 0.89 | 1.17  | 0.08  | 0.14  | 0.21  | -0.04 | 30 | 41 |
| 2D3D_A  | 84  | a     | 0.66 | 0.91 | 1.15  | -0.16 | 0.22  | 0.39  | -0.05 | 31 | 54 |
| 2ERB_A  | 124 | a     | 0.78 | 0.99 | 0.37  | 0.33  | 0.09  | 0.09  | 0.01  | 29 | 47 |
| 2F01_A  | 122 | b     | 0.70 | 0.98 | 0.76  | 0.04  | -0.07 | -0.18 | -0.09 | 39 | 59 |
| 2FTR_A  | 97  | a+b   | 0.79 | 0.90 | 1.36  | 0.00  | 0.01  | 0.00  | -0.06 | 26 | 36 |
| 2GMY_A  | 148 | a     | 0.64 | 0.99 | 0.29  | 0.42  | 0.33  | 0.45  | 0.02  | 20 | 30 |
| 2GPI_A  | 92  | a+b   | 0.49 | 0.82 | 1.92  | 0.43  | 0.19  | 0.11  | 0.07  | 9  | 17 |
| 2J2J_A  | 183 | b     | 0.90 | 0.77 | 3.62  | -0.35 | 0.23  | 0.14  | 0.10  | 23 | 36 |
| 2J5Y_A  | 55  | a     | 0.77 | 0.91 | 1.24  | 4.00  | -0.39 | -0.04 | -0.18 | 35 | 55 |
| 2J8B_A  | 79  | small | 0.70 | 0.90 | 1.16  | 0.00  | 0.04  | 0.15  | -0.03 | 32 | 52 |
| 2O1Q_A  | 140 | b     | 0.68 | 0.53 | 10.01 | 1.08  | 0.35  | 0.42  | 0.22  | 17 | 26 |
| 2O9S_A  | 68  | b     | 0.76 | 0.83 | 3.15  | 0.12  | 0.08  | 0.43  | 0.10  | 39 | 74 |
| 2P5K_A  | 64  | a     | 0.64 | 0.96 | 0.53  | 0.00  | 0.02  | 0.52  | -0.01 | 38 | 63 |
| 2PR7_A  | 138 | a/b   | 0.78 | 0.70 | 4.83  | 0.25  | 0.22  | 0.22  | 0.25  | 27 | 39 |
| 2PTH_A  | 194 | a/b   | 0.71 | 0.98 | 0.58  | 0.00  | 0.18  | 0.01  | 0.00  | 25 | 37 |
| 2PV2_A  | 104 | a+b   | 0.91 | 0.96 | 0.69  | 0.36  | 0.15  | -0.11 | 0.03  | 32 | 59 |
| 2QCP_X  | 77  | b     | 0.77 | 0.94 | 0.77  | 0.83  | 1.14  | 0.95  | 0.30  | 18 | 42 |
| 2V0U_A  | 147 | a/b   | 0.77 | 0.92 | 2.65  | 0.15  | 0.02  | 0.12  | -0.03 | 54 | 70 |
| 2V1Q_A  | 60  | b     | 0.82 | 0.91 | 1.01  | 0.00  | 0.22  | 0.48  | 0.12  | 34 | 36 |
| 2VMH_A  | 148 | b     | 0.71 | 0.97 | 0.95  | 0.18  | -0.03 | 0.22  | 0.05  | 24 | 25 |
| 2VPB_A  | 58  | a+b   | 0.68 | 0.86 | 1.15  | -0.07 | -0.15 | -0.13 | -0.03 | 39 | 64 |
| 2VZC_A  | 128 | a     | 0.79 | 0.93 | 1.24  | 0.29  | 0.26  | 0.60  | 0.18  | 19 | 34 |
| 2WLV_A  | 145 | a/b   | 0.75 | 0.92 | 1.49  | 0.05  | 0.05  | 0.19  | -0.02 | 33 | 42 |
| 2ZXY_A  | 87  | a     | 0.63 | 0.69 | 4.22  | -0.18 | 0.09  | 0.02  | 0.01  | 36 | 55 |
| 3CTG_A  | 109 | a/b   | 0.89 | 0.97 | 0.76  | -0.25 | 0.05  | 0.03  | 0.00  | 39 | 54 |
| 3E9T_A  | 113 | b     | 0.86 | 0.99 | 0.31  | 0.11  | -0.01 | 0.03  | 0.01  | 39 | 41 |
| 3EBT_A  | 132 | a+b   | 0.78 | 0.92 | 1.47  | -0.11 | -0.05 | 0.01  | -0.01 | 29 | 33 |
| 3EF8_A  | 150 | a+b   | 0.74 | 0.80 | 8.05  | 0.52  | 0.39  | 0.29  | -0.02 | 23 | 27 |
| 3FEA_A  | 84  | a+b   | 0.57 | 0.97 | 0.57  | -0.06 | 0.18  | -0.06 | -0.02 | 42 | 69 |
| 3FIL_A  | 57  | a+b   | 0.84 | 0.92 | 0.73  | -0.11 | -0.20 | -0.20 | 0.01  | 63 | 92 |
| 3G21_A  | 78  | a     | 0.45 | 0.36 | 11.57 | 3.57  | 0.12  | 1.26  | 0.18  | 12 | 16 |
| 3G36_A  | 53  | a     | 0.43 | 0.32 | 11.19 | 1.67  | -0.23 | -0.36 | -0.45 | 21 | 0  |
| 3IV4_A  | 107 | a/b   | 0.80 | 0.82 | 1.95  | -0.36 | -0.07 | -0.07 | 0.04  | 22 | 34 |
| 3VUB_A  | 102 | b     | 0.70 | 0.88 | 1.54  | 0.28  | 0.12  | 0.33  | 0.06  | 18 | 31 |
| Average | 111 |       | 0.71 | 0.87 | 2.12  | 0.33  | 0.14  | 0.22  | 0.02  | 28 | 41 |

<sup>a</sup>Length of targets.

<sup>b</sup>SCOP type of targets.

<sup>c</sup>Average TM-score between the first I-TASSER model of design sequence and the structural analogs used for profiling.

<sup>d</sup>TM-score computed between the first I-TASSER model of design sequence and the target scaffold.

<sup>e</sup>RMSD computed between the first I-TASSER model of design sequence and the target scaffold.
