# Supplementary material for: An Evolution-Based Approach to De Novo Protein Design and Case Study on Mycobacterium tuberculosis
Source: PubMed Central journal article supplement (PMC3812052; doi:10.1371/journal.pcbi.1003298), 2013-10-24
Supplement: pcbi.1003298.s008.pdf [file pcbi.1003298.s008.pdf]

**Table S3.** Summary of EvBM design on the 87 test proteins.

| PDBID  | TM-score <sup>a</sup> | RMSD (Å) <sup>b</sup> | Normalized relative error |       |       |       | Sequence identity (%) |      |
|--------|-----------------------|-----------------------|---------------------------|-------|-------|-------|-----------------------|------|
|        |                       |                       | SS                        | Φ     | Ψ     | SA    | All                   | Core |
| 1A2P_A | 0.99                  | 0.35                  | 0.12                      | 0.31  | 0.03  | -0.03 | 48                    | 44   |
| 1ABA_A | 0.69                  | 3.41                  | 3.20                      | 0.64  | 0.23  | 0.30  | 18                    | 25   |
| 1BKR_A | 0.99                  | 0.28                  | 0.33                      | 0.09  | -0.10 | -0.05 | 42                    | 55   |
| 1DBW_A | 0.85                  | 2.02                  | -0.08                     | 0.14  | 0.00  | 0.00  | 29                    | 44   |
| 1EAQ_A | 0.92                  | 1.42                  | -0.26                     | -0.03 | -0.19 | -0.11 | 30                    | 37   |
| 1EW4_A | 0.94                  | 0.92                  | 0.75                      | 0.61  | 0.34  | -0.07 | 16                    | 31   |
| 1F46_A | 0.97                  | 0.66                  | 0.27                      | 0.25  | -0.23 | -0.01 | 27                    | 29   |
| 1GBS_A | 0.99                  | 0.16                  | 1.35                      | 0.19  | 0.07  | 0.13  | 54                    | 65   |
| 1GUT_A | 0.91                  | 0.77                  | -0.33                     | 0.09  | -0.12 | 0.03  | 24                    | 11   |
| 1HZT_A | 0.95                  | 1.08                  | 0.00                      | 0.42  | 0.25  | 0.04  | 21                    | 23   |
| 1I2T_A | 0.93                  | 0.76                  | 0.29                      | 0.12  | 0.69  | 0.20  | 25                    | 57   |
| 1IDP_A | 0.75                  | 3.69                  | 0.16                      | 0.17  | 0.08  | 0.14  | 26                    | 21   |
| 1IUJ_A | 0.72                  | 3.13                  | 0.57                      | 0.06  | 0.60  | -0.19 | 27                    | 43   |
| 1JB3_A | 0.48                  | 6.07                  | 0.12                      | 0.32  | -0.10 | 0.28  | 26                    | 33   |
| 1JF8_A | 0.78                  | 3.04                  | 0.09                      | 0.31  | 0.93  | 0.26  | 28                    | 34   |
| 1KMT_A | 0.95                  | 1.04                  | 0.14                      | 0.10  | 0.01  | -0.02 | 28                    | 30   |
| 1KNG_A | 0.96                  | 0.95                  | 0.50                      | 0.17  | 0.11  | 0.03  | 26                    | 34   |
| 1KQ1_A | 0.81                  | 1.65                  | 0.29                      | 0.79  | 0.44  | 0.08  | 23                    | 54   |
| 1M9Z_A | 0.92                  | 1.26                  | 0.19                      | 0.22  | 0.68  | 0.01  | 45                    | 51   |
| 1MF7_A | 0.96                  | 1.16                  | 0.14                      | 0.29  | 0.15  | 0.07  | 37                    | 57   |
| 1MG4_A | 0.45                  | 8.43                  | 1.67                      | 0.45  | 0.52  | 0.14  | 13                    | 20   |
| 1NXM_A | 0.94                  | 1.48                  | 0.09                      | 0.33  | 0.36  | 0.11  | 26                    | 24   |
| 1NZ0_A | 0.58                  | 6.80                  | 0.74                      | 0.24  | 0.37  | 0.23  | 14                    | 25   |
| 1O7L_A | 0.99                  | 0.39                  | -0.15                     | 0.32  | -0.17 | 0.02  | 22                    | 33   |
| 1OAI_A | 0.65                  | 5.06                  | 0.80                      | 1.00  | 1.25  | 0.14  | 21                    | 8    |
| 1OH0_A | 0.96                  | 0.95                  | 0.05                      | 0.27  | 0.00  | 0.04  | 31                    | 35   |
| 1OK0_A | 0.62                  | 4.06                  | -0.14                     | 0.05  | -0.11 | 0.03  | 14                    | 25   |
| 1QHQ_A | 0.51                  | 9.60                  | 0.31                      | 0.32  | 0.34  | -0.07 | 30                    | 40   |
| 1R26_A | 0.90                  | 1.33                  | 0.20                      | 0.21  | -0.07 | 0.07  | 30                    | 31   |
| 1R6J_A | 0.91                  | 1.48                  | -0.25                     | 0.32  | -0.06 | 0.07  | 32                    | 50   |
| 1SHU_X | 0.96                  | 1.21                  | 0.13                      | 0.40  | -0.05 | -0.04 | 25                    | 42   |
| 1T3Y_A | 0.73                  | 3.57                  | 0.08                      | 0.23  | 0.31  | 0.15  | 19                    | 24   |
| 1TQG_A | 0.94                  | 0.96                  | 1.25                      | 0.04  | 0.16  | -0.02 | 24                    | 21   |
| 1TUK_A | 0.25                  | 11.13                 | 0.44                      | 0.52  | 2.10  | 0.02  | 10                    | 16   |
| 1UCS_A | 0.85                  | 1.86                  | -0.16                     | -0.01 | -0.12 | -0.09 | 50                    | 72   |
| 1URR_A | 0.94                  | 0.96                  | 0.13                      | 0.11  | 0.73  | 0.00  | 31                    | 38   |
| 1UTG_A | 0.83                  | 2.08                  | 3.33                      | -0.19 | 0.41  | -0.29 | 10                    | 10   |
| 1V5L_B | 0.63                  | 3.25                  | -0.29                     | 0.34  | 0.03  | -0.15 | 10                    | 0    |
| 1VH5_A | 0.98                  | 0.48                  | 0.13                      | 0.41  | 0.22  | 0.06  | 31                    | 28   |
| 1VKK_A | 0.93                  | 1.45                  | 0.13                      | 0.24  | 1.07  | 0.02  | 26                    | 28   |
| 1VQS_A | 0.68                  | 3.31                  | -0.11                     | 0.41  | 0.33  | 0.03  | 20                    | 7    |
| 1VZI_A | 0.34                  | 11.67                 | 0.52                      | 0.43  | -0.01 | 0.23  | 6                     | 8    |
| 1WLU_A | 0.98                  | 0.49                  | 0.00                      | 0.31  | 0.08  | 0.03  | 32                    | 41   |

|         |      |       |       |       |       |       |    |    |
|---------|------|-------|-------|-------|-------|-------|----|----|
| 1X6Z_A  | 0.67 | 4.23  | 0.53  | 0.52  | 0.42  | -0.03 | 31 | 22 |
| 1XTE_A  | 0.89 | 2.06  | 0.27  | 0.25  | 0.42  | -0.09 | 26 | 44 |
| 1ZHV_A  | 0.65 | 5.86  | 0.56  | 0.54  | 1.05  | 0.26  | 14 | 18 |
| 1ZKE_A  | 0.26 | 14.51 | 0.06  | -0.03 | 0.01  | 0.14  | 12 | 18 |
| 1ZZK_A  | 0.83 | 3.11  | 0.29  | 0.48  | 0.16  | 0.03  | 41 | 64 |
| 2ANX_A  | 0.99 | 0.30  | 0.09  | 0.08  | 0.30  | 0.00  | 28 | 34 |
| 2BWF_A  | 0.92 | 1.21  | -0.35 | 0.34  | 0.27  | -0.02 | 40 | 65 |
| 2C9Q_A  | 0.77 | 2.51  | 0.39  | 0.28  | 0.16  | -0.29 | 19 | 29 |
| 2CAR_A  | 0.96 | 1.06  | -0.03 | 0.12  | 0.13  | 0.06  | 31 | 40 |
| 2CMP_A  | 0.61 | 2.27  | 4.00  | 0.34  | 0.36  | 0.00  | 17 | 23 |
| 2CVI_A  | 0.92 | 0.95  | -0.17 | 0.32  | 0.58  | 0.03  | 29 | 36 |
| 2D3D_A  | 0.90 | 1.29  | 0.16  | 0.39  | 1.24  | 0.04  | 24 | 38 |
| 2ERB_A  | 0.99 | 0.35  | 0.50  | 0.18  | 0.27  | 0.01  | 32 | 39 |
| 2F01_A  | 0.98 | 0.75  | -0.22 | -0.08 | -0.05 | 0.12  | 43 | 52 |
| 2FTR_A  | 0.73 | 2.73  | 0.44  | 0.62  | 0.42  | 0.05  | 27 | 24 |
| 2GMY_A  | 0.97 | 1.44  | 0.42  | 0.32  | 0.35  | 0.20  | 23 | 26 |
| 2GPI_A  | 0.46 | 8.26  | 0.93  | 0.42  | 0.42  | -0.13 | 12 | 17 |
| 2J2J_A  | 0.78 | 3.54  | -0.19 | 0.23  | 0.20  | -0.14 | 21 | 31 |
| 2J5Y_A  | 0.93 | 0.86  | 3.00  | -0.31 | 0.32  | -0.04 | 33 | 36 |
| 2J8B_A  | 0.91 | 1.23  | 3.33  | 0.14  | 0.21  | 0.19  | 41 | 52 |
| 2O1Q_A  | 0.64 | 9.04  | 0.71  | 0.49  | 0.32  | 0.03  | 19 | 24 |
| 2O9S_A  | 0.81 | 3.53  | 0.25  | 0.25  | -0.07 | 0.03  | 34 | 53 |
| 2P5K_A  | 0.93 | 0.73  | 0.33  | 0.17  | 1.12  | 0.28  | 30 | 38 |
| 2PR7_A  | 0.70 | 5.72  | 0.22  | 0.37  | 0.36  | 0.03  | 19 | 25 |
| 2PTH_A  | 0.96 | 1.37  | 0.29  | 0.29  | -0.10 | 0.04  | 36 | 51 |
| 2PV2_A  | 0.95 | 0.84  | 0.36  | 0.10  | 0.19  | 0.23  | 33 | 53 |
| 2QCP_X  | 0.89 | 1.16  | 1.67  | 1.15  | 0.89  | 0.07  | 14 | 21 |
| 2V0U_A  | 0.93 | 2.74  | 0.05  | 0.10  | 0.24  | 0.07  | 59 | 68 |
| 2V1Q_A  | 0.88 | 1.11  | 0.20  | 0.25  | 0.33  | 0.05  | 29 | 29 |
| 2VMH_A  | 0.90 | 2.13  | 0.14  | 0.18  | 0.11  | 0.02  | 24 | 22 |
| 2VPB_A  | 0.83 | 1.27  | 0.07  | -0.18 | 0.44  | 0.13  | 32 | 55 |
| 2VZC_A  | 0.91 | 1.48  | 0.24  | 0.43  | 0.79  | 0.15  | 20 | 34 |
| 2WLV_A  | 0.91 | 1.62  | -0.11 | 0.10  | 0.25  | -0.02 | 42 | 49 |
| 2ZXY_A  | 0.81 | 1.98  | 0.09  | 0.45  | 0.06  | -0.04 | 33 | 41 |
| 3CTG_A  | 0.97 | 0.74  | -0.12 | 0.15  | -0.09 | -0.02 | 43 | 51 |
| 3E9T_A  | 0.99 | 0.29  | 0.33  | 0.08  | 0.10  | 0.03  | 41 | 50 |
| 3EBT_A  | 0.89 | 1.63  | 0.00  | 0.18  | 0.15  | 0.04  | 29 | 28 |
| 3EF8_A  | 0.80 | 7.14  | 0.28  | 0.31  | 0.29  | -0.06 | 28 | 33 |
| 3FEA_A  | 0.97 | 0.54  | -0.12 | 0.45  | 0.24  | 0.04  | 35 | 58 |
| 3FIL_A  | 0.92 | 0.75  | -0.11 | -0.01 | -0.21 | 0.01  | 52 | 75 |
| 3G21_A  | 0.29 | 15.25 | 2.71  | 0.15  | 1.27  | -0.32 | 12 | 16 |
| 3G36_A  | 0.41 | 5.03  | 3.67  | 0.18  | 0.84  | 0.02  | 13 | 0  |
| 3IV4_A  | 0.81 | 2.11  | -0.36 | 0.04  | 0.04  | 0.00  | 20 | 24 |
| 3VUB_A  | 0.71 | 3.10  | 0.38  | 0.20  | 0.11  | 0.11  | 20 | 31 |
| Average | 0.82 | 2.82  | 0.48  | 0.26  | 0.30  | 0.04  | 27 | 35 |

<sup>a</sup>TM-score between the first I-TASSER model of design sequence and the target scaffold.

<sup>b</sup>RMSD between the first I-TASSER model and the target scaffold.
