# Supplementary material for: An Evolution-Based Approach to De Novo Protein Design and Case Study on Mycobacterium tuberculosis
Source: PubMed Central journal article supplement (PMC3812052; doi:10.1371/journal.pcbi.1003298), 2013-10-24
Supplement: pcbi.1003298.s009.pdf [file pcbi.1003298.s009.pdf]

**Table S4.** Summary of PBM design on the 87 test proteins.

| PDBID  | TM-score <sup>a</sup> | RMSD (Å) <sup>b</sup> | Normalized relative error |       |       |       | Sequence Identity (%) |      |
|--------|-----------------------|-----------------------|---------------------------|-------|-------|-------|-----------------------|------|
|        |                       |                       | SS                        | Φ     | Ψ     | SA    | All                   | Core |
| 1A2P_A | 0.91                  | 1.45                  | 2.88                      | 0.23  | 1.11  | 0.73  | 21                    | 38   |
| 1ABA_A | 0.94                  | 0.91                  | 0.80                      | -0.07 | 0.01  | 0.05  | 33                    | 58   |
| 1BKR_A | 0.98                  | 0.45                  | 2.22                      | 0.09  | 0.21  | 0.48  | 24                    | 40   |
| 1DBW_A | 0.90                  | 1.49                  | 3.17                      | 0.44  | 0.92  | 0.34  | 20                    | 27   |
| 1EAQ_A | 0.89                  | 1.53                  | 0.46                      | -0.08 | 0.24  | -0.04 | 23                    | 37   |
| 1EW4_A | 0.26                  | 11.88                 | 2.58                      | 0.45  | 1.04  | 0.30  | 12                    | 7    |
| 1F46_A | 0.98                  | 0.52                  | 0.18                      | 0.07  | 0.07  | 0.15  | 23                    | 33   |
| 1GBS_A | 0.87                  | 2.42                  | 3.00                      | 0.56  | 0.30  | 0.65  | 19                    | 27   |
| 1GUT_A | 0.76                  | 1.49                  | 3.17                      | -0.01 | 0.67  | 0.08  | 20                    | 44   |
| 1HZT_A | 0.97                  | 0.79                  | 1.17                      | 1.03  | 2.58  | 0.54  | 23                    | 33   |
| 1I2T_A | 0.74                  | 1.79                  | 0.29                      | -0.14 | 0.23  | 0.33  | 15                    | 21   |
| 1IDP_A | 0.20                  | 16.66                 | 2.13                      | 0.54  | 1.70  | 0.61  | 17                    | 30   |
| 1IUJ_A | 0.63                  | 4.21                  | 2.86                      | 0.26  | 2.92  | 0.81  | 19                    | 21   |
| 1JB3_A | 0.98                  | 0.57                  | 0.92                      | 0.06  | 0.11  | 0.07  | 25                    | 39   |
| 1JF8_A | 0.99                  | 0.36                  | 2.18                      | 0.46  | 1.40  | 0.42  | 25                    | 44   |
| 1KMT_A | 0.29                  | 10.24                 | 3.03                      | 0.75  | 2.11  | 0.45  | 21                    | 32   |
| 1KNG_A | 0.99                  | 0.27                  | 1.88                      | 0.69  | 1.55  | 0.43  | 24                    | 28   |
| 1KQ1_A | 0.21                  | 14.84                 | 5.57                      | 1.27  | 2.47  | 0.34  | 17                    | 31   |
| 1M9Z_A | 0.18                  | 15.92                 | 3.38                      | 0.64  | 2.02  | 0.46  | 8                     | 8    |
| 1MF7_A | 0.92                  | 1.68                  | 1.89                      | 0.74  | 1.16  | 0.70  | 14                    | 20   |
| 1MG4_A | 0.84                  | 2.28                  | 3.50                      | 0.34  | 0.44  | 0.40  | 24                    | 37   |
| 1NXM_A | 0.89                  | 2.56                  | 1.79                      | 0.47  | 1.20  | 0.62  | 18                    | 19   |
| 1NZ0_A | 0.66                  | 4.18                  | 1.16                      | 0.05  | 0.16  | 0.74  | 23                    | 38   |
| 1O7I_A | 0.98                  | 0.48                  | 2.77                      | 0.88  | 1.16  | 0.35  | 26                    | 44   |
| 1OAI_A | 0.85                  | 1.37                  | 1.00                      | 1.09  | 2.00  | 0.37  | 18                    | 23   |
| 1OH0_A | 0.95                  | 1.12                  | 2.47                      | 1.52  | 3.17  | 0.65  | 24                    | 24   |
| 1OK0_A | 0.72                  | 2.27                  | 0.32                      | -0.12 | 0.22  | 0.21  | 27                    | 55   |
| 1QHQ_A | 0.98                  | 0.47                  | 0.76                      | 0.18  | 0.86  | 0.27  | 21                    | 33   |
| 1R26_A | 0.75                  | 2.78                  | 9.80                      | 1.36  | 3.33  | 0.47  | 16                    | 23   |
| 1R6J_A | 0.88                  | 1.51                  | 3.75                      | 0.30  | 1.27  | 0.44  | 32                    | 65   |
| 1SHU_X | 0.96                  | 1.17                  | 0.25                      | 0.09  | -0.14 | 0.04  | 21                    | 24   |
| 1T3Y_A | 0.19                  | 15.86                 | 1.65                      | 0.58  | 0.73  | 0.54  | 17                    | 33   |
| 1TQG_A | 0.41                  | 6.43                  | 1.50                      | 0.53  | 0.76  | 0.83  | 13                    | 18   |
| 1TUK_A | 0.77                  | 1.75                  | -0.11                     | 0.01  | 0.17  | -0.04 | 25                    | 42   |
| 1UCS_A | 0.96                  | 0.81                  | 0.05                      | 0.13  | 0.75  | 0.45  | 30                    | 61   |
| 1URR_A | 0.96                  | 0.87                  | 4.25                      | 0.67  | 2.70  | 0.49  | 23                    | 44   |
| 1UTG_A | 0.92                  | 0.86                  | 1.00                      | -0.21 | 0.48  | 0.22  | 17                    | 30   |

|        |      |       |       |       |       |       |    |    |
|--------|------|-------|-------|-------|-------|-------|----|----|
| 1V5I_B | 0.64 | 3.66  | 1.36  | 0.44  | 0.95  | 0.36  | 26 | 50 |
| 1VH5_A | 0.96 | 0.87  | 7.00  | 0.83  | 2.00  | 0.26  | 20 | 30 |
| 1VKK_A | 0.21 | 17.15 | 3.13  | 0.63  | 2.81  | 0.57  | 16 | 28 |
| 1VQS_A | 0.70 | 5.75  | 1.05  | 0.58  | 1.66  | 0.48  | 23 | 25 |
| 1VZI_A | 0.97 | 0.69  | 1.74  | 0.40  | 0.94  | 0.40  | 22 | 42 |
| 1WLU_A | 0.97 | 0.75  | 9.00  | 2.12  | 4.41  | 0.40  | 25 | 38 |
| 1X6Z_A | 0.91 | 1.47  | 1.65  | 0.27  | 0.37  | 0.27  | 24 | 27 |
| 1XTE_A | 0.85 | 2.90  | 3.09  | 0.30  | 1.50  | 0.37  | 17 | 19 |
| 1ZHV_A | 0.98 | 0.64  | 1.40  | 0.46  | 1.56  | 0.38  | 29 | 49 |
| 1ZKE_A | 0.90 | 1.95  | -0.39 | -0.27 | -0.61 | 0.72  | 22 | 29 |
| 1ZZK_A | 0.84 | 2.85  | 1.29  | 0.20  | 0.02  | 0.59  | 26 | 45 |
| 2ANX_A | 0.88 | 3.04  | 0.83  | 0.43  | 0.56  | 0.74  | 21 | 40 |
| 2BWF_A | 0.87 | 1.35  | 0.65  | 0.71  | 2.77  | 0.26  | 17 | 35 |
| 2C9Q_A | 0.78 | 2.56  | 2.26  | 0.34  | 1.55  | 0.62  | 25 | 39 |
| 2CAR_A | 0.99 | 0.32  | -0.03 | -0.08 | -0.03 | -0.61 | 25 | 39 |
| 2CMP_A | 0.82 | 1.27  | 5.50  | 0.42  | 1.42  | 0.54  | 25 | 69 |
| 2CVI_A | 0.34 | 9.84  | 3.08  | 1.37  | 3.11  | 0.58  | 23 | 50 |
| 2D3D_A | 0.90 | 1.12  | 0.26  | 0.26  | 0.46  | 0.87  | 25 | 54 |
| 2ERB_A | 0.87 | 2.84  | 3.33  | 0.20  | 0.76  | 0.67  | 19 | 22 |
| 2F01_A | 0.44 | 6.69  | 1.89  | 0.51  | 1.18  | 0.45  | 19 | 21 |
| 2FTR_A | 0.32 | 9.23  | 3.00  | 0.42  | 0.83  | 0.39  | 23 | 28 |
| 2GMY_A | 0.95 | 1.17  | 2.42  | 0.72  | 1.39  | 0.58  | 15 | 26 |
| 2GPI_A | 0.25 | 13.64 | 2.50  | 0.35  | 0.95  | 0.78  | 16 | 35 |
| 2J2J_A | 0.17 | 17.86 | 1.65  | 0.09  | 0.84  | 0.14  | 20 | 34 |
| 2J5Y_A | 0.37 | 11.98 | 11.00 | 0.04  | -0.07 | 0.43  | 13 | 36 |
| 2J8B_A | 0.20 | 9.20  | 11.33 | 0.49  | 0.88  | 0.41  | 9  | 12 |
| 2O1Q_A | 0.97 | 0.92  | 0.17  | 0.09  | 0.71  | -0.14 | 28 | 33 |
| 2O9S_A | 0.80 | 3.24  | 3.62  | 0.31  | 1.33  | 0.61  | 34 | 63 |
| 2P5K_A | 0.25 | 11.87 | 5.33  | 1.11  | 3.81  | 0.38  | 19 | 38 |
| 2PR7_A | 0.98 | 0.61  | -0.44 | -0.32 | -0.11 | -0.05 | 30 | 33 |
| 2PTH_A | 0.94 | 1.37  | 0.52  | 0.18  | 0.12  | 0.11  | 22 | 29 |
| 2PV2_A | 0.97 | 0.66  | 2.09  | 1.04  | 1.22  | 0.67  | 24 | 44 |
| 2QCP_X | 0.95 | 0.74  | 4.33  | 0.74  | 1.09  | 0.34  | 26 | 63 |
| 2V0U_A | 0.93 | 4.26  | -0.50 | 0.21  | -0.04 | 0.10  | 17 | 26 |
| 2V1Q_A | 0.86 | 1.13  | 5.60  | 0.88  | 1.81  | 0.51  | 27 | 64 |
| 2VMH_A | 0.77 | 3.10  | 2.95  | 0.27  | 1.29  | 0.64  | 23 | 31 |
| 2VPB_A | 0.21 | 9.99  | 0.43  | -0.09 | 0.64  | 0.41  | 11 | 18 |
| 2VZC_A | 0.99 | 0.27  | 0.06  | -0.01 | 0.07  | -0.05 | 28 | 43 |
| 2WLV_A | 0.97 | 0.83  | 0.89  | 0.05  | 0.30  | 0.42  | 20 | 27 |
| 2ZXY_A | 0.20 | 12.48 | 2.27  | 0.04  | -0.26 | 0.64  | 20 | 27 |
| 3CTG_A | 0.97 | 0.69  | 0.81  | 0.73  | 0.82  | 0.36  | 25 | 35 |

|         |      |       |      |       |      |      |    |    |
|---------|------|-------|------|-------|------|------|----|----|
| 3E9T_A  | 0.98 | 0.60  | 6.67 | 0.43  | 1.67 | 0.57 | 22 | 41 |
| 3EBT_A  | 0.67 | 4.54  | 3.44 | 1.84  | 2.66 | 0.70 | 27 | 47 |
| 3EF8_A  | 0.22 | 18.02 | 2.76 | 0.93  | 1.97 | 0.48 | 17 | 29 |
| 3FEA_A  | 0.97 | 0.51  | 0.94 | 0.45  | 0.66 | 0.62 | 34 | 58 |
| 3FIL_A  | 0.89 | 0.93  | 1.89 | -0.03 | 0.30 | 0.49 | 25 | 58 |
| 3G21_A  | 0.36 | 8.68  | 2.00 | 0.10  | 0.42 | 0.77 | 16 | 5  |
| 3G36_A  | 0.52 | 4.50  | 1.00 | -0.14 | 0.52 | 0.03 | 15 | 0  |
| 3IV4_A  | 0.79 | 2.46  | 1.00 | 0.39  | 0.75 | 0.17 | 14 | 26 |
| 3VUB_A  | 0.91 | 1.17  | 1.03 | 0.13  | 0.47 | 0.24 | 19 | 34 |
| Average | 0.74 | 4.14  | 2.40 | 0.43  | 1.11 | 0.41 | 21 | 35 |

<sup>a</sup>TM-score between the first I-TASSER model of design sequence and the target scaffold.

<sup>b</sup>RMSD between the first I-TASSER model and the target scaffold.
