# Supplementary material for: An Evolution-Based Approach to De Novo Protein Design and Case Study on Mycobacterium tuberculosis
Source: PubMed Central journal article supplement (PMC3812052; doi:10.1371/journal.pcbi.1003298), 2013-10-24
Supplement: pcbi.1003298.s010.pdf [file pcbi.1003298.s010.pdf]

**Table S5.** Summary of EBM based protein design on the *M. tuberculosis* genome. The data has been sorted by the normalized relative error (NRE) on secondary structure.

| PDBID  | L <sup>a</sup> | Sep <sup>b</sup> | N <sub>p</sub> <sup>c</sup> | SI% <sup>d</sup> | R(Å) <sup>e</sup> | Normalized relative error |       |       |       | Sequence identity (%) |      |
|--------|----------------|------------------|-----------------------------|------------------|-------------------|---------------------------|-------|-------|-------|-----------------------|------|
|        |                |                  |                             |                  |                   | SS                        | Φ     | Ψ     | SA    | All                   | Core |
| 3FAV_A | 74             |                  | 167                         | 9                | 2.14              | -0.47                     | -0.54 | -0.64 | -0.47 | 9                     | 17   |
| 3FAV_B | 72             |                  | 34                          | 10               | 2.34              | -0.40                     | -0.32 | 0.08  | 0.03  | 17                    | 18   |
| 2G38_A | 77             | a                | 60                          | 10               | 2.46              | -0.36                     | -0.09 | -0.25 | -0.71 | 18                    | 58   |
| 3H6P_C | 56             |                  | 20                          | 13               | 3.23              | -0.33                     | 0.12  | 0.13  | -0.01 | 14                    | 20   |
| 1IM5_A | 179            | a/b              | 22                          | 25               | 0.28              | -0.29                     | 0.03  | 0.01  | -0.02 | 39                    | 59   |
| 2ZHX_B | 82             | a+b              | 338                         | 7                | 0.89              | -0.28                     | 0.11  | 0.21  | -0.05 | 17                    | 20   |
| 1P3H_A | 99             | b                | 53                          | 17               | 1.06              | -0.27                     | 0.07  | -0.07 | 0.06  | 26                    | 47   |
| 3KNH_H | 138            |                  | 10                          | 41               | 1.89              | -0.26                     | 0.06  | -0.12 | 0.00  | 46                    | 44   |
| 3KNI_S | 98             |                  | 27                          | 15               | 3.57              | -0.25                     | -0.07 | -0.08 | 0.23  | 17                    | 27   |
| 2PMU_A | 98             |                  | 11                          | 30               | 1.44              | -0.25                     | 0.05  | 0.46  | 0.03  | 36                    | 50   |
| 1UVH_A | 157            | a                | 88                          | 13               | 2.42              | -0.23                     | -0.11 | -0.03 | -0.05 | 22                    | 28   |
| 3MPZ_A | 125            |                  | 11                          | 38               | 0.42              | -0.20                     | 0.23  | 0.39  | 0.08  | 50                    | 55   |
| 3NFW_A | 179            |                  | 20                          | 20               | 0.28              | -0.19                     | -0.05 | 0.02  | -0.02 | 30                    | 51   |
| 3M6C_A | 194            |                  | 30                          | 16               | 0.87              | -0.19                     | 0.01  | 0.10  | 0.07  | 31                    | 44   |
| 2W72_B | 146            |                  | 71                          | 25               | 0.89              | -0.19                     | -0.16 | -0.09 | 0.00  | 30                    | 38   |
| 3IOS_A | 134            |                  | 93                          | 18               | 2.02              | -0.18                     | 0.07  | 0.10  | 0.03  | 28                    | 39   |
| 2CGQ_A | 74             |                  | 31                          | 23               | 1.24              | -0.18                     | -0.23 | -0.01 | -0.06 | 35                    | 62   |
| 1TFU_A | 157            | a/b              | 28                          | 22               | 0.91              | -0.16                     | -0.03 | -0.06 | 0.01  | 36                    | 47   |
| 2A6P_A | 193            |                  | 22                          | 23               | 2.65              | -0.15                     | 0.01  | -0.08 | 0.17  | 30                    | 41   |
| 2H7V_A | 178            | a/b              | 95                          | 24               | 1.43              | -0.15                     | 0.05  | 0.36  | -0.01 | 33                    | 38   |
| 2NM3_A | 121            | a+b              | 13                          | 20               | 0.33              | -0.14                     | 0.02  | -0.01 | 0.03  | 31                    | 50   |
| 3RIH_A | 260            |                  | 224                         | 25               | 0.85              | -0.14                     | 0.06  | -0.11 | 0.02  | 33                    | 42   |
| 3HX9_A | 101            |                  | 16                          | 16               | 1.15              | -0.14                     | 0.21  | 0.41  | -0.09 | 27                    | 31   |
| 2Z2I_A | 179            | a+b              | 60                          | 12               | 1.75              | -0.13                     | 0.21  | 0.20  | 0.03  | 16                    | 19   |
| 3NY4_A | 265            |                  | 48                          | 24               | 1.45              | -0.13                     | 0.13  | 0.10  | 0.01  | 26                    | 38   |
| 3POT_A | 136            |                  | 10                          | 21               | 1.00              | -0.12                     | 0.06  | 0.06  | -0.03 | 30                    | 55   |
| 3KNI_D | 271            |                  | 10                          | 36               | 1.89              | -0.12                     | 0.09  | 0.14  | -0.05 | 37                    | 47   |
| 3NBK_A | 158            |                  | 30                          | 25               | 0.91              | -0.12                     | -0.01 | 0.05  | -0.02 | 39                    | 53   |
| 3P2J_A | 191            |                  | 44                          | 15               | 1.22              | -0.12                     | 0.01  | 0.27  | -0.01 | 27                    | 34   |
| 2Z90_A | 161            |                  | 72                          | 13               | 6.67              | -0.12                     | -0.12 | 0.08  | -0.07 | 17                    | 21   |
| 2VKL_A | 77             |                  | 22                          | 12               | 3.26              | -0.11                     | 0.22  | -0.12 | 0.18  | 12                    | 33   |
| 1U2P_A | 156            |                  | 12                          | 27               | 1.09              | -0.10                     | 0.13  | -0.12 | 0.01  | 37                    | 52   |
| 3MYB_A | 259            |                  | 66                          | 23               | 2.03              | -0.09                     | 0.04  | 0.05  | 0.04  | 28                    | 44   |
| 3KNH_E | 150            |                  | 10                          | 27               | 1.28              | -0.09                     | 0.13  | 0.12  | -0.01 | 35                    | 48   |
| 2YW6_A | 148            | a                | 98                          | 14               | 1.52              | -0.09                     | -0.13 | -0.21 | -0.11 | 20                    | 20   |
| 3A2G_A | 154            |                  | 72                          | 22               | 0.95              | -0.08                     | 0.26  | 0.08  | -0.02 | 34                    | 37   |
| 2QXX_A | 189            |                  | 12                          | 19               | 1.02              | -0.08                     | 0.30  | 0.13  | 0.04  | 32                    | 45   |
| 2XWL_A | 221            |                  | 50                          | 18               | 0.42              | -0.08                     | 0.24  | -0.07 | -0.01 | 23                    | 32   |
| 3MXU_A | 134            |                  | 11                          | 28               | 4.36              | -0.08                     | -0.07 | -0.09 | 0.17  | 35                    | 47   |
| 3QXZ_A | 259            |                  | 66                          | 23               | 1.89              | -0.07                     | 0.06  | 0.13  | 0.09  | 32                    | 47   |
| 3KNH_G | 155            |                  | 10                          | 40               | 3.80              | -0.07                     | 0.27  | 0.14  | 0.20  | 37                    | 48   |

|        |     |     |     |    |       |       |       |       |       |    |    |
|--------|-----|-----|-----|----|-------|-------|-------|-------|-------|----|----|
| 3KNH_I | 127 |     | 14  | 28 | 1.07  | -0.07 | -0.05 | -0.01 | 0.00  | 38 | 38 |
| 3R9T_A | 260 |     | 70  | 26 | 18.09 | -0.06 | 0.04  | -0.03 | 0.00  | 31 | 50 |
| 1J7S_B | 146 | a   | 71  | 26 | 0.94  | -0.06 | -0.05 | -0.10 | 0.00  | 36 | 46 |
| 2VVR_A | 147 |     | 11  | 41 | 0.86  | -0.06 | -0.12 | 0.03  | 0.01  | 44 | 57 |
| 2C45_A | 113 |     | 66  | 13 | 0.52  | -0.06 | -0.09 | -0.19 | -0.01 | 24 | 34 |
| 3MOY_A | 258 |     | 67  | 27 | 1.15  | -0.06 | 0.04  | 0.10  | 0.03  | 34 | 51 |
| 2A15_A | 133 | a+b | 47  | 15 | 0.91  | -0.05 | 0.09  | 0.48  | -0.07 | 22 | 15 |
| 1ZNW_A | 182 | a/b | 12  | 31 | 0.55  | -0.05 | 0.08  | 0.04  | -0.04 | 37 | 55 |
| 3KNI_6 | 50  |     | 22  | 19 | 5.20  | -0.05 | -0.04 | -0.13 | -0.06 | 12 | 20 |
| 3C4I_A | 99  |     | 15  | 26 | 0.51  | -0.05 | -0.13 | -0.09 | -0.01 | 37 | 60 |
| 3HGB_A | 134 |     | 10  | 43 | 0.35  | -0.05 | -0.02 | -0.07 | -0.01 | 50 | 65 |
| 3KNI_Y | 100 |     | 10  | 27 | 4.79  | -0.04 | -0.10 | 0.08  | 0.04  | 34 | 56 |
| 3H81_A | 256 |     | 69  | 28 | 1.04  | -0.04 | 0.17  | -0.04 | -0.01 | 36 | 55 |
| 3HH2_A | 109 |     | 10  | 34 | 0.60  | -0.03 | 0.12  | -0.17 | 0.07  | 39 | 78 |
| 1YK9_A | 184 |     | 13  | 28 | 7.79  | -0.03 | 0.08  | 0.29  | 0.35  | 24 | 39 |
| 3KNI_E | 204 |     | 11  | 30 | 10.20 | -0.03 | 0.21  | 0.13  | 0.63  | 15 | 20 |
| 2QZ8_A | 146 |     | 10  | 32 | 1.34  | -0.03 | 0.02  | -0.11 | 0.02  | 36 | 53 |
| 2NTV_A | 268 |     | 188 | 18 | 2.85  | -0.03 | 0.19  | 0.15  | 0.00  | 24 | 27 |
| 1P9L_A | 245 | a/b | 107 | 12 | 0.96  | -0.03 | 0.43  | 0.31  | 0.04  | 19 | 26 |
| 3FGN_A | 230 |     | 13  | 16 | 0.50  | -0.03 | 0.32  | -0.02 | 0.00  | 20 | 31 |
| 3GWK_C | 98  |     | 17  | 17 | 1.29  | 0.00  | -0.23 | 0.10  | -0.17 | 30 | 54 |
| 3KNH_J | 98  |     | 10  | 35 | 1.24  | 0.00  | -0.12 | -0.14 | 0.04  | 40 | 55 |
| 2X89_A | 128 |     | 105 | 37 | 2.35  | 0.00  | -0.04 | -0.17 | 0.03  | 52 | 58 |
| 3KNI_R | 117 |     | 20  | 17 | 1.52  | 0.00  | -0.08 | -0.11 | -0.01 | 29 | 41 |
| 3EUL_A | 123 |     | 178 | 18 | 0.74  | 0.00  | 0.00  | -0.11 | 0.00  | 33 | 45 |
| 3KNI_W | 113 |     | 10  | 37 | 0.89  | 0.00  | -0.09 | 0.13  | -0.01 | 43 | 56 |
| 3C57_A | 51  |     | 19  | 28 | 6.53  | 0.00  | -0.24 | -0.31 | 0.06  | 29 | 63 |
| 2C2X_A | 280 |     | 48  | 16 | 1.16  | 0.00  | 0.02  | 0.00  | 0.04  | 26 | 35 |
| 2W29_A | 147 |     | 10  | 32 | 0.92  | 0.00  | -0.04 | 0.04  | 0.03  | 37 | 47 |
| 3HUG_A | 80  |     | 22  | 13 | 3.00  | 0.00  | 0.40  | 0.12  | 0.11  | 26 | 75 |
| 1L4U_A | 165 | a/b | 61  | 17 | 3.02  | 0.00  | 0.01  | -0.04 | -0.02 | 21 | 29 |
| 3LHD_A | 253 |     | 21  | 19 | 0.80  | 0.00  | 0.33  | 0.40  | -0.01 | 25 | 30 |
| 3R20_A | 217 |     | 10  | 27 | 0.17  | 0.00  | 0.29  | -0.10 | 0.04  | 36 | 52 |
| 1W66_A | 218 | a+b | 14  | 14 | 0.25  | 0.00  | 0.09  | 0.03  | 0.05  | 23 | 30 |
| 2O8X_A | 61  |     | 16  | 22 | 1.66  | 0.00  | 0.19  | -0.01 | -0.19 | 30 | 45 |
| 3KNI_2 | 71  |     | 31  | 17 | 0.86  | 0.00  | 0.04  | -0.28 | 0.02  | 23 | 70 |
| 1WQG_A | 184 | a+b | 10  | 24 | 1.45  | 0.00  | 0.20  | -0.01 | 0.00  | 40 | 48 |
| 1XZ0_B | 98  | b   | 119 | 20 | 1.96  | 0.00  | 0.04  | -0.06 | 0.31  | 29 | 50 |
| 2W6X_A | 154 |     | 72  | 22 | 0.93  | 0.00  | 0.06  | 0.14  | 0.03  | 31 | 38 |
| 1W19_A | 147 |     | 10  | 36 | 0.59  | 0.00  | 0.06  | 0.12  | 0.00  | 40 | 54 |
| 3KNI_X | 92  |     | 10  | 35 | 1.60  | 0.00  | 0.06  | -0.13 | -0.03 | 36 | 48 |
| 3IJF_X | 123 |     | 10  | 35 | 0.82  | 0.00  | 0.21  | 0.38  | -0.05 | 40 | 50 |
| 3D55_A | 68  |     | 19  | 12 | 1.40  | 0.00  | 0.17  | 0.34  | 0.26  | 16 | 17 |
| 2IUU_A | 108 |     | 137 | 24 | 2.52  | 0.00  | 0.27  | 0.52  | 0.00  | 38 | 65 |
| 1NXJ_A | 156 | a/b | 30  | 16 | 0.22  | 0.00  | 0.10  | 0.30  | 0.04  | 35 | 49 |
| 1DF7_A | 159 | a/b | 32  | 27 | 0.27  | 0.00  | 0.16  | 0.05  | 0.04  | 34 | 46 |
| 2FVH_A | 99  |     | 86  | 11 | 0.93  | 0.00  | 0.22  | 0.23  | -0.01 | 23 | 39 |
| 3ICO_A | 244 |     | 15  | 29 | 0.30  | 0.03  | 0.01  | 0.08  | 0.04  | 31 | 46 |
| 2W3B_A | 185 |     | 29  | 27 | 0.82  | 0.03  | 0.11  | 0.20  | 0.01  | 38 | 51 |

|        |     |     |     |    |       |      |       |       |       |    |    |
|--------|-----|-----|-----|----|-------|------|-------|-------|-------|----|----|
| 3NDO_A | 225 |     | 252 | 12 | 2.58  | 0.03 | 0.07  | 0.02  | 0.01  | 23 | 29 |
| 3QKA_A | 233 |     | 71  | 25 | 2.24  | 0.03 | 0.19  | -0.07 | 0.06  | 33 | 47 |
| 2W25_A | 147 |     | 10  | 25 | 1.24  | 0.03 | -0.01 | -0.01 | 0.04  | 29 | 41 |
| 1U5H_A | 223 | a/b | 68  | 13 | 0.45  | 0.03 | 0.11  | -0.03 | 0.01  | 23 | 29 |
| 2XB9_A | 158 |     | 202 | 10 | 0.98  | 0.04 | -0.02 | 0.32  | 0.09  | 20 | 32 |
| 3KNI_U | 117 |     | 14  | 24 | 1.27  | 0.04 | -0.05 | -0.09 | -0.01 | 38 | 56 |
| 1Y25_A | 165 | a/b | 42  | 22 | 1.03  | 0.04 | 0.23  | 0.00  | 0.09  | 29 | 38 |
| 1NBU_A | 118 | a+b | 18  | 23 | 0.76  | 0.05 | -0.12 | -0.07 | -0.05 | 33 | 59 |
| 1NBU_C | 118 | a+b | 16  | 19 | 0.72  | 0.05 | -0.02 | -0.04 | 0.00  | 32 | 49 |
| 3KNH_N | 60  |     | 10  | 21 | 2.36  | 0.05 | -0.04 | 0.01  | 0.10  | 33 | 57 |
| 3GWM_A | 129 |     | 13  | 27 | 3.41  | 0.05 | 0.35  | 0.18  | 0.07  | 34 | 50 |
| 3KNH_B | 234 |     | 27  | 14 | 1.84  | 0.05 | 0.00  | -0.05 | -0.02 | 19 | 31 |
| 2JFR_A | 234 |     | 14  | 22 | 3.52  | 0.05 | 0.29  | 0.37  | 0.09  | 22 | 34 |
| 1J7Y_B | 146 | a   | 71  | 25 | 0.85  | 0.06 | -0.06 | -0.17 | 0.00  | 30 | 38 |
| 3I86_A | 136 |     | 10  | 38 | 1.02  | 0.06 | -0.05 | 0.02  | 0.06  | 49 | 62 |
| 3KNI_V | 101 |     | 12  | 12 | 4.53  | 0.07 | -0.03 | 0.14  | 0.54  | 22 | 43 |
| 3KNH_F | 101 |     | 95  | 10 | 4.27  | 0.07 | 0.19  | 0.71  | -0.03 | 21 | 41 |
| 2Y88_A | 244 |     | 46  | 15 | 4.99  | 0.07 | 0.25  | 0.05  | 0.04  | 23 | 28 |
| 2CDN_A | 186 | a/b | 26  | 28 | 1.22  | 0.07 | 0.13  | 0.29  | 0.04  | 36 | 53 |
| 3I7T_A | 118 |     | 26  | 26 | 1.58  | 0.07 | -0.06 | -0.03 | 0.08  | 36 | 60 |
| 3NE3_B | 129 |     | 12  | 29 | 2.30  | 0.07 | 0.26  | -0.09 | 0.04  | 33 | 46 |
| 1NAZ_A | 154 | a   | 71  | 22 | 1.12  | 0.08 | 0.39  | 0.23  | 0.07  | 24 | 29 |
| 3PK0_A | 260 |     | 223 | 25 | 0.63  | 0.08 | 0.02  | 0.09  | 0.02  | 26 | 37 |
| 3QHA_A | 277 |     | 52  | 16 | 14.76 | 0.08 | 0.19  | -0.05 | 0.05  | 24 | 38 |
| 2A11_A | 154 |     | 10  | 24 | 0.93  | 0.08 | 0.11  | -0.24 | -0.03 | 37 | 51 |
| 3ASE_A | 154 |     | 71  | 22 | 0.89  | 0.08 | 0.17  | 0.08  | 0.02  | 34 | 43 |
| 2IVM_A | 147 |     | 10  | 33 | 1.01  | 0.09 | -0.02 | -0.03 | 0.04  | 39 | 56 |
| 3ONR_A | 71  |     | 14  | 14 | 2.44  | 0.09 | 0.24  | 0.13  | 0.05  | 27 | 78 |
| 3KNI_F | 207 |     | 10  | 30 | 5.10  | 0.09 | 0.03  | 0.18  | 0.02  | 28 | 31 |
| 3HZA_A | 162 |     | 11  | 32 | 0.27  | 0.10 | 0.07  | 0.22  | -0.01 | 41 | 64 |
| 3SBX_A | 177 |     | 11  | 27 | 0.36  | 0.10 | -0.05 | 0.45  | 0.00  | 31 | 39 |
| 2CHC_A | 169 | a+b | 42  | 12 | 4.03  | 0.10 | 0.37  | 0.19  | -0.04 | 24 | 33 |
| 3PL1_A | 185 |     | 20  | 25 | 5.31  | 0.10 | 0.19  | 0.20  | 0.27  | 22 | 32 |
| 3QJ7_A | 260 |     | 17  | 47 | 0.82  | 0.10 | 0.11  | 0.04  | 0.08  | 41 | 49 |
| 3ODG_A | 273 |     | 25  | 23 | 1.57  | 0.11 | 0.22  | 0.15  | 0.08  | 34 | 40 |
| 2V2X_A | 275 | b   | 19  | 36 | 7.19  | 0.11 | 0.34  | 0.18  | 0.37  | 25 | 29 |
| 3HNT_L | 214 |     | 17  | 41 | 3.60  | 0.11 | 0.13  | 0.05  | 0.16  | 38 | 55 |
| 3L60_A | 229 |     | 24  | 15 | 1.06  | 0.11 | 0.15  | 0.24  | 0.03  | 21 | 30 |
| 3KNI_O | 122 |     | 10  | 56 | 3.65  | 0.11 | 0.15  | 0.01  | 0.28  | 50 | 55 |
| 1J7W_A | 141 | a   | 74  | 27 | 0.83  | 0.13 | 0.08  | 0.05  | -0.07 | 38 | 53 |
| 1Y0H_A | 101 | a+b | 36  | 15 | 1.19  | 0.13 | 0.04  | 0.28  | 0.13  | 18 | 23 |
| 2WT9_A | 207 |     | 17  | 23 | 0.32  | 0.13 | 0.19  | 0.05  | 0.03  | 29 | 44 |
| 3KNH_P | 83  |     | 10  | 19 | 0.84  | 0.13 | 0.05  | 0.06  | 0.02  | 24 | 30 |
| 2R5U_A | 144 |     | 20  | 13 | 0.40  | 0.13 | 0.27  | 0.13  | -0.01 | 28 | 48 |
| 3F8L_A | 162 |     | 14  | 18 | 0.38  | 0.14 | 0.29  | 0.10  | 0.05  | 21 | 28 |
| 1D0I_A | 150 | a/b | 495 | 10 | 1.07  | 0.15 | 0.16  | 0.00  | 0.11  | 19 | 30 |
| 3HSS_A | 274 |     | 79  | 16 | 0.69  | 0.15 | 0.09  | 0.08  | 0.00  | 21 | 31 |
| 2VE6_B | 99  | b   | 120 | 19 | 1.63  | 0.15 | 0.03  | 0.16  | 0.02  | 33 | 55 |
| 2WUG_A | 283 |     | 75  | 19 | 1.32  | 0.16 | 0.27  | 0.26  | 0.03  | 26 | 33 |

|        |     |     |     |    |       |      |       |       |       |    |    |
|--------|-----|-----|-----|----|-------|------|-------|-------|-------|----|----|
| 3R2N_A | 119 |     | 11  | 32 | 0.48  | 0.17 | 0.26  | 0.39  | 0.03  | 45 | 52 |
| 3QK8_A | 259 |     | 70  | 22 | 17.19 | 0.17 | 0.18  | 0.39  | 0.05  | 25 | 33 |
| 3I4O_A | 68  |     | 21  | 20 | 1.67  | 0.17 | -0.09 | 0.11  | -0.17 | 32 | 58 |
| 1X89_A | 174 | b   | 19  | 23 | 2.46  | 0.18 | 0.04  | 0.42  | 0.04  | 28 | 52 |
| 3KNI_Q | 141 |     | 10  | 24 | 2.64  | 0.19 | 0.00  | 0.03  | -0.03 | 40 | 61 |
| 1L1E_A | 272 | a/b | 33  | 16 | 1.77  | 0.19 | 0.01  | 0.11  | 0.02  | 24 | 27 |
| 3H5J_A | 168 |     | 12  | 25 | 1.26  | 0.19 | -0.12 | -0.16 | 0.01  | 36 | 47 |
| 1GTV_A | 208 | a/b | 17  | 20 | 2.38  | 0.20 | 0.44  | 0.10  | 0.03  | 27 | 41 |
| 1LU4_A | 134 | a/b | 86  | 16 | 1.93  | 0.20 | 0.28  | 0.31  | 0.03  | 23 | 40 |
| 3K3C_A | 152 |     | 73  | 10 | 2.55  | 0.20 | 0.16  | 0.06  | 0.06  | 22 | 29 |
| 2VE6_A | 276 | a+b | 19  | 35 | 10.65 | 0.21 | 0.35  | 0.27  | 0.41  | 25 | 33 |
| 1TPY_A | 285 | a/b | 22  | 18 | 1.14  | 0.21 | 0.01  | 0.05  | 0.03  | 24 | 29 |
| 2BM5_A | 183 | b   | 21  | 12 | 4.28  | 0.21 | 0.15  | 0.22  | 0.01  | 17 | 26 |
| 3TDT_A | 274 | b   | 10  | 22 | 3.09  | 0.21 | 0.14  | -0.02 | 0.10  | 36 | 44 |
| 2GLN_A | 128 |     | 85  | 14 | 1.03  | 0.22 | 0.09  | 0.18  | -0.04 | 32 | 50 |
| 2QRW_A | 126 |     | 76  | 11 | 0.65  | 0.23 | 0.29  | -0.12 | 0.15  | 18 | 30 |
| 3KNI_N | 138 |     | 11  | 39 | 1.12  | 0.24 | -0.02 | 0.09  | 0.01  | 41 | 60 |
| 3F8M_A | 230 |     | 16  | 16 | 10.65 | 0.25 | 0.15  | 0.35  | 0.05  | 23 | 26 |
| 2V2X_B | 100 | b   | 113 | 20 | 1.61  | 0.25 | -0.01 | -0.16 | 0.10  | 29 | 44 |
| 2B70_A | 162 | a+b | 13  | 88 | 4.53  | 0.25 | 0.39  | 0.60  | 0.34  | 46 | 41 |
| 3NE0_A | 208 |     | 10  | 33 | 0.65  | 0.26 | 0.11  | 0.10  | 0.08  | 50 | 69 |
| 3PPI_A | 258 |     | 221 | 22 | 1.04  | 0.26 | 0.11  | 0.16  | 0.03  | 29 | 40 |
| 3NB5_A | 257 |     | 21  | 44 | 3.42  | 0.26 | 0.24  | 0.20  | 0.15  | 39 | 50 |
| 3DWG_C | 92  |     | 13  | 19 | 1.29  | 0.27 | -0.19 | -0.23 | 0.01  | 37 | 50 |
| 2G4R_A | 153 |     | 14  | 28 | 1.14  | 0.27 | -0.09 | 0.07  | -0.01 | 33 | 43 |
| 1PQW_A | 183 | a/b | 62  | 20 | 2.88  | 0.27 | 0.13  | -0.05 | 0.06  | 27 | 35 |
| 2O03_A | 129 |     | 10  | 16 | 9.12  | 0.29 | 0.16  | -0.02 | 0.08  | 27 | 52 |
| 3RFQ_A | 154 |     | 14  | 28 | 0.23  | 0.32 | 0.16  | 0.29  | 0.01  | 38 | 51 |
| 3QUA_A | 179 |     | 11  | 28 | 2.64  | 0.33 | 0.23  | 0.49  | 0.12  | 31 | 39 |
| 3OCC_A | 237 |     | 37  | 23 | 1.49  | 0.33 | 0.16  | 0.08  | -0.01 | 27 | 29 |
| 3PO8_A | 98  |     | 30  | 23 | 1.12  | 0.33 | 0.10  | 0.09  | 0.03  | 29 | 39 |
| 3KNI_P | 146 |     | 10  | 14 | 4.51  | 0.33 | 0.12  | 0.06  | 0.20  | 21 | 20 |
| 2XW7_A | 175 |     | 30  | 15 | 4.62  | 0.34 | 0.51  | 0.29  | 0.15  | 20 | 29 |
| 1N3N_B | 99  | b   | 118 | 19 | 2.70  | 0.37 | 0.04  | 0.43  | 0.20  | 25 | 37 |
| 3G1M_A | 194 |     | 48  | 16 | 1.43  | 0.38 | 0.07  | 0.08  | -0.01 | 18 | 21 |
| 2XPG_A | 274 |     | 19  | 22 | 12.09 | 0.38 | 0.19  | 0.38  | 0.37  | 29 | 34 |
| 2QVB_A | 296 |     | 59  | 17 | 5.08  | 0.39 | 0.02  | -0.03 | 0.27  | 15 | 19 |
| 3OC6_A | 243 |     | 15  | 29 | 4.42  | 0.40 | 0.06  | 0.41  | 0.27  | 21 | 32 |
| 3AJX_A | 207 |     | 632 | 12 | 0.49  | 0.43 | 0.34  | 0.05  | 0.02  | 19 | 24 |
| 1QPO_A | 284 | a/b | 15  | 32 | 3.22  | 0.43 | 0.31  | 0.41  | 0.34  | 29 | 36 |
| 3D0S_A | 224 |     | 10  | 31 | 4.74  | 0.45 | 0.24  | 0.54  | 0.06  | 27 | 38 |
| 1UZR_A | 282 | a   | 20  | 21 | 2.84  | 0.46 | 0.01  | 0.32  | 0.37  | 18 | 26 |
| 3KNI_H | 163 |     | 10  | 32 | 7.20  | 0.50 | 0.00  | 0.05  | 0.26  | 26 | 29 |
| 2VG0_A | 227 |     | 44  | 9  | 1.74  | 0.52 | 0.12  | 0.29  | 0.12  | 21 | 25 |
| 2WZM_A | 274 |     | 33  | 32 | 4.80  | 0.53 | 0.31  | 0.28  | 0.19  | 24 | 34 |
| 3R0O_A | 262 |     | 68  | 25 | 18.90 | 0.54 | 0.34  | 0.38  | 0.18  | 24 | 32 |
| 2VVP_A | 157 | a/b | 10  | 27 | 3.62  | 0.55 | 0.53  | 0.57  | 0.01  | 32 | 42 |
| 1DT0_A | 197 | a+b | 34  | 45 | 4.75  | 0.55 | 0.29  | 0.32  | 0.47  | 31 | 39 |
| 2IB0_A | 142 |     | 98  | 11 | 3.88  | 0.56 | 0.16  | 0.29  | 0.01  | 14 | 25 |

|        |     |     |     |    |       |      |       |       |       |    |    |
|--------|-----|-----|-----|----|-------|------|-------|-------|-------|----|----|
| 1W74_A | 171 | b   | 30  | 37 | 3.63  | 0.56 | 0.26  | 0.13  | 0.15  | 33 | 46 |
| 2FR2_A | 161 | b   | 18  | 11 | 6.16  | 0.57 | 0.54  | 1.06  | 0.05  | 22 | 25 |
| 3KNH_T | 99  |     | 74  | 10 | 5.09  | 0.57 | -0.04 | 0.11  | 0.03  | 19 | 56 |
| 3K6Y_A | 227 |     | 10  | 20 | 4.93  | 0.58 | 0.19  | 0.33  | 0.17  | 24 | 33 |
| 3G5O_B | 81  |     | 63  | 10 | 0.88  | 0.58 | -0.05 | 0.56  | 0.12  | 16 | 26 |
| 1G2O_A | 262 | a/b | 29  | 19 | 5.06  | 0.59 | 0.63  | 0.51  | 0.33  | 21 | 27 |
| 2W72_A | 141 |     | 74  | 27 | 3.29  | 0.62 | 0.29  | 0.33  | 0.33  | 25 | 38 |
| 2VZW_A | 146 |     | 33  | 15 | 1.49  | 0.64 | 0.25  | 0.51  | 0.03  | 20 | 33 |
| 2WVO_A | 158 |     | 19  | 33 | 5.56  | 0.68 | 0.29  | 0.42  | 0.22  | 32 | 45 |
| 1I9G_A | 264 | a/b | 15  | 20 | 3.18  | 0.68 | 0.76  | 0.80  | 0.30  | 16 | 23 |
| 1W5R_A | 273 | a+b | 10  | 44 | 5.38  | 0.70 | 0.39  | 0.55  | 0.28  | 30 | 34 |
| 2H7M_A | 268 | a/b | 189 | 19 | 6.82  | 0.71 | 0.61  | 0.54  | 0.05  | 15 | 16 |
| 1R88_A | 267 | a/b | 42  | 11 | 5.30  | 0.73 | 0.26  | 0.13  | 0.44  | 12 | 18 |
| 3HUG_B | 62  |     | 161 | 8  | 1.33  | 0.75 | 0.10  | 0.02  | 0.19  | 19 | 14 |
| 2VLR_E | 240 | b   | 23  | 33 | 10.14 | 0.76 | 0.41  | 0.32  | 0.23  | 30 | 34 |
| 2G2D_A | 160 |     | 10  | 36 | 2.40  | 0.77 | 0.19  | -0.06 | 0.09  | 36 | 51 |
| 1NGK_A | 126 | a   | 77  | 12 | 3.94  | 0.79 | 0.16  | 0.03  | 0.10  | 22 | 32 |
| 3R9Q_A | 233 |     | 72  | 26 | 5.16  | 0.79 | 0.35  | 0.29  | 0.15  | 19 | 27 |
| 3PKA_A | 284 |     | 26  | 25 | 11.45 | 0.79 | 0.43  | 0.57  | 0.34  | 25 | 32 |
| 1PM4_A | 117 | b   | 88  | 7  | 11.91 | 0.81 | -0.06 | 0.34  | 0.17  | 13 | 21 |
| 2O7G_A | 88  |     | 12  | 13 | 0.43  | 0.83 | 0.24  | 0.45  | 0.00  | 23 | 44 |
| 2W3G_A | 150 |     | 26  | 17 | 0.50  | 0.85 | 0.45  | 0.33  | 0.06  | 27 | 36 |
| 1NFF_A | 244 | a/b | 253 | 25 | 4.88  | 0.85 | 0.37  | 0.33  | 0.34  | 24 | 34 |
| 3HST_B | 139 |     | 10  | 25 | 7.38  | 0.85 | 0.28  | 1.03  | 0.29  | 24 | 33 |
| 1PZS_A | 171 | b   | 19  | 24 | 8.92  | 0.87 | 0.47  | 0.52  | 0.53  | 19 | 28 |
| 1YLK_A | 163 |     | 11  | 22 | 5.22  | 0.88 | 0.10  | 0.41  | 0.06  | 24 | 30 |
| 2ZFZ_A | 77  |     | 36  | 13 | 1.00  | 0.89 | 0.08  | 0.21  | 0.08  | 23 | 39 |
| 3KNI_G | 181 |     | 11  | 35 | 8.91  | 0.90 | 0.21  | 0.34  | 0.41  | 30 | 44 |
| 2Q7Y_B | 98  | a+b | 119 | 19 | 3.07  | 0.92 | 0.13  | 0.26  | 0.17  | 26 | 50 |
| 3G5O_A | 92  |     | 12  | 9  | 1.42  | 0.92 | 0.18  | 1.09  | -0.06 | 21 | 50 |
| 3KNH_K | 119 |     | 38  | 12 | 1.29  | 1.00 | -0.10 | 0.08  | -0.04 | 24 | 35 |
| 3PVV_A | 96  |     | 68  | 9  | 0.36  | 1.00 | -0.20 | 0.07  | -0.07 | 20 | 32 |
| 2VLR_D | 199 | b   | 19  | 56 | 8.36  | 1.04 | 0.35  | 0.26  | 0.40  | 20 | 24 |
| 2ZYQ_A | 296 |     | 15  | 22 | 6.35  | 1.10 | 0.50  | 0.63  | 0.35  | 22 | 26 |
| 3QD8_A | 172 |     | 27  | 19 | 5.17  | 1.11 | 0.21  | 0.25  | 0.32  | 14 | 22 |
| 1K44_A | 135 | a+b | 29  | 48 | 6.30  | 1.17 | 0.41  | 0.61  | 0.34  | 39 | 52 |
| 1LMI_A | 131 | b   | 73  | 7  | 2.02  | 1.17 | 0.31  | 0.55  | 0.18  | 17 | 17 |
| 1XZ0_A | 271 | b   | 17  | 30 | 17.14 | 1.19 | 0.38  | 0.68  | 0.37  | 20 | 28 |
| 3F9R_A | 246 |     | 24  | 18 | 8.43  | 1.19 | 0.22  | 0.32  | 0.27  | 20 | 27 |
| 1S8N_A | 190 | a/b | 227 | 12 | 9.40  | 1.24 | 0.36  | 1.26  | 0.20  | 25 | 35 |
| 3KNH_S | 78  |     | 56  | 12 | 1.97  | 1.26 | -0.14 | -0.05 | 0.16  | 26 | 32 |
| 3H87_A | 136 |     | 33  | 11 | 0.60  | 1.26 | 0.60  | 1.16  | 0.07  | 25 | 47 |
| 3HNT_H | 220 |     | 28  | 43 | 15.89 | 1.30 | 0.56  | 0.45  | 0.66  | 17 | 20 |
| 1F0N_A | 284 | a/b | 13  | 15 | 9.75  | 1.38 | 0.73  | 0.39  | 0.40  | 15 | 21 |
| 3KNI_7 | 48  |     | 56  | 13 | 5.79  | 1.40 | -0.14 | -0.06 | 0.15  | 23 | 33 |
| 2AQ6_A | 143 | b   | 16  | 15 | 5.06  | 1.40 | 0.52  | 0.98  | 0.36  | 13 | 11 |
| 3OL3_A | 98  |     | 100 | 8  | 10.66 | 1.42 | 0.06  | 0.72  | -0.12 | 15 | 37 |
| 1YK3_A | 198 | a+b | 43  | 11 | 3.38  | 1.50 | 0.28  | 0.33  | 0.25  | 17 | 18 |
| 3MAY_A | 86  |     | 213 | 8  | 2.48  | 1.83 | -0.12 | -0.13 | 0.09  | 20 | 31 |

|                      |     |     |     |    |       |      |      |      |      |    |    |
|----------------------|-----|-----|-----|----|-------|------|------|------|------|----|----|
| 1IDS_A               | 198 | a+b | 35  | 41 | 11.17 | 1.85 | 0.39 | 0.85 | 0.54 | 25 | 32 |
| 3E3U_A               | 196 |     | 13  | 27 | 12.14 | 1.91 | 0.52 | 0.26 | 0.54 | 22 | 32 |
| 3HC7_A               | 252 |     | 56  | 9  | 17.46 | 2.03 | 0.30 | 0.42 | 0.27 | 19 | 27 |
| 2IG3_A               | 127 |     | 78  | 9  | 5.04  | 2.67 | 0.33 | 0.52 | 0.32 | 15 | 23 |
| 3PGX_A               | 270 |     | 210 | 24 | 12.42 | 2.69 | 0.73 | 1.01 | 0.41 | 25 | 36 |
| 2C92_A               | 147 |     | 10  | 36 | 6.59  | 2.83 | 0.40 | 0.43 | 0.51 | 22 | 29 |
| Average <sup>f</sup> | 133 |     | 46  | 22 | 2.57  | 0.27 | 0.10 | 0.16 | 0.07 | 29 | 41 |
| Average <sup>g</sup> | 169 |     | 51  | 23 | 3.28  | 0.29 | 0.14 | 0.18 | 0.09 | 28 | 39 |

<sup>a</sup>Length of protein target.

<sup>b</sup>SCOP type provided whenever they are available in SCOP database.

<sup>c</sup>The number of structural analogs used to construct the structural profile.

<sup>d</sup>The average sequence identity between the target sequence and the sequence of the structural analogs used for profiling.

<sup>e</sup>RMSD between the first I-TASSER model and the target scaffold.

<sup>f</sup>Average results on the cases with length <200 AA.

<sup>g</sup>Average results on all cases.
